# Supplementary material for: Transport Turnover Rates for Human OCT2 and MATE1 Expressed in Chinese Hamster Ovary Cells
Source: MDPI journal article supplement (doi:10.3390/ijms23031472), 2022-01-27
Supplement: s1 [file s1]

**Table S1.** List of Transporter Turnover Rates (TORs) for Representative Transport Processes.

| Category         | Transporter | TOR (sec <sup>-1</sup> ) | Reference     |
|------------------|-------------|--------------------------|---------------|
| uniport          | OCT2        | 43                       | current study |
|                  | OCT2        | 2.8                      | [1]           |
|                  | OCT1        | 4.6                      | [1]           |
|                  | Hxt7        | 200                      | [2]           |
|                  | GLUT4       | 283                      | [3]           |
|                  | GLUT3       | 853                      | [4]           |
|                  | GLUT4       | 350                      | [5]           |
|                  | GLUT1       | 1200                     | [6]           |
|                  | GLUT1       | 450                      | [3]           |
|                  | ENT1        | 112                      | [7]           |
|                  | ENT1        | 46                       | [8]           |
| countertransport | MATE1       | 463                      | current study |
|                  | MATE1       | 0.4                      | [1]           |
|                  | MATE2-K     | 2.2                      | [1]           |
|                  | VMAT1       | 0.2                      | [9]           |
|                  | VMAT1       | 0.2                      | [10]          |
|                  | SVAT        | 2                        |               |
|                  | NHE1-3      | 459                      | [11]          |
|                  | NHE1-3      | 80                       | [11]          |
|                  | NHE1        | 3000                     | [12]          |
|                  | NHE1        | 3000                     | [13]          |
|                  | NHE         | 2000                     | [14]          |
| cotransport      | SGLT1       | 38                       | [15]          |
|                  | SGLT1       | 57                       | [16]          |
|                  | rSGLT1      | 30                       | [17]          |
|                  | rbPEPT1     | 100                      | [18]          |
|                  | pSGLT2      | 60                       | [19]          |
|                  | SERT        | 1.83                     | [20]          |
|                  | SERT        | 3.1                      | [21]          |
|                  | NKCC        | 255                      | [22]          |
|                  | NET         | 0.11                     | [20]          |
|                  | MCT1        | 12.2                     | [23]          |
|                  | LacY        | 69                       | [24]          |
|                  | LacY        | 48                       | [25]          |
|                  | DAT         | 1.92                     | [20]          |
|                  | AAP1/NAT2   | 350                      | [26]          |

## References

1. Yin, J.; Duan, H.; Shirasaka, Y.; Prasad, B.; Wang, J., Atenolol renal secretion is mediated by human Organic Cation Transporter 2 and Multidrug and Toxin Extrusion proteins. *Drug Metab. Dispos.* **2015**, 43, (12), 1872-81.
2. Ye, L.; Berden, J. A.; van Dam, K.; Kruckeberg, A. L., Expression and activity of the Hxt7 high-affinity hexose transporter of *Saccharomyces cerevisiae*. *Yeast* **2001**, 18, (13), 1257-67.
3. Nishimura, H.; Pallardo, F. V.; Seidner, G. A.; Vannucci, S.; Simpson, I. A.; Birnbaum, M. J., Kinetics of GLUT1 and GLUT4 glucose transporters expressed in *Xenopus* oocytes. *J. Biol. Chem.* **1993**, 268, (12), 8514-20.
4. Maher, F.; Davies-Hill, T. M.; Simpson, I. A., Substrate specificity and kinetic parameters of GLUT3 in rat cerebellar granule neurons. *Biochem. J.* **1996**, 315 ( Pt 3), 827-31.
5. Goodyear, L. J.; Hirshman, M. F.; Valyou, P. M.; Horton, E. S., Glucose transporter number, function, and subcellular distribution in rat skeletal muscle after exercise training. *Diabetes* **1992**, 41, (9), 1091-9.
6. Palfreyman, R. W.; Clark, A. E.; Denton, R. M.; Holman, G. D.; Kozka, I. J., Kinetic resolution of the separate GLUT1 and GLUT4 glucose transport activities in 3T3-L1 cells. *Biochem. J.* **1992**, 284 ( Pt 1), 275-82.
7. Doherty, A. J.; Jarvis, S. M., Na(+)-dependent and -independent uridine uptake in an established renal epithelial cell line, OK, from the opossum kidney. *Biochim. Biophys. Acta* **1993**, 1147, (2), 214-22.
8. Ward, J. L.; Sherali, A.; Mo, Z. P.; Tse, C. M., Kinetic and pharmacological properties of cloned human equilibrative nucleoside transporters, ENT1 and ENT2, stably expressed in nucleoside transporter-deficient PK15 cells. Ent2 exhibits a low affinity for guanosine and cytidine but a high affinity for inosine. *J. Biol. Chem.* **2000**, 275, (12), 8375-8381.
9. Gasnier, B.; Krejci, E.; Botton, D.; Massoulie, J.; Henry, J. P., Expression of a bovine vesicular monoamine transporter in COS cells. *FEBS Lett.* **1994**, 342, (3), 225-9.
10. Peter, D.; Jimenez, J.; Liu, Y.; Kim, J.; Edwards, R. H., The chromaffin granule and synaptic vesicle amine transporters differ in substrate recognition and sensitivity to inhibitors. *J. Biol. Chem.* **1994**, 269, (10), 7231-7.
11. Cavet, M. E.; Akhter, S.; de Medina, F. S.; Donowitz, M.; Tse, C. M., Na<sup>+</sup>/H<sup>+</sup> exchangers (NHE1-3) have similar turnover numbers but different percentages on the cell surface. *Am. J. Physiol.* **1999**, 277, (6 Pt 1), C1111-21.
12. Siczkowski, M.; Davies, J. E.; Ng, L. L., Activity and density of the Na<sup>+</sup>/H<sup>+</sup> antiporter in normal and transformed human lymphocytes and fibroblasts. *Am. J. Physiol.* **1994**, 267, (3 Pt 1), C745-52.
13. Siczkowski, M.; Ng, L. L., Culture density and the activity, abundance and phosphorylation of the Na<sup>+</sup>/H<sup>+</sup> exchanger isoform 1 in human fibroblasts. *Biochem. Biophys. Res. Commun.* **1995**, 209, (1), 191-7.
14. Dixon, S. J.; Cohen, S.; Cragoe, E. J., Jr.; Grinstein, S., Estimation of the number and turnover rate of Na<sup>+</sup>/H<sup>+</sup> exchangers in lymphocytes. Effect of phorbol ester and osmotic shrinking. *J. Biol. Chem.* **1987**, 262, (8), 3626-32.
15. Hirsch, J. R.; Loo, D. D.; Wright, E. M., Regulation of Na<sup>+</sup>/glucose cotransporter expression by protein kinases in *Xenopus laevis* oocytes. *J. Biol. Chem.* **1996**, 271, (25), 14740-6.
16. Loo, D. D.; Hazama, A.; Supplisson, S.; Turk, E.; Wright, E. M., Relaxation kinetics of the Na<sup>+</sup>/glucose cotransporter. *Proc. Natl. Acad. Sci. U. S. A.* **1993**, 90, (12), 5767-71.
17. Panayotova-Heiermann, M.; Loo, D. D.; Wright, E. M., Kinetics of steady-state currents and charge movements associated with the rat Na<sup>+</sup>/glucose cotransporter. *J. Biol. Chem.* **1995**, 270, (45), 27099-105.
18. Mackenzie, B.; Loo, D. D.; Fei, Y.; Liu, W. J.; Ganapathy, V.; Leibach, F. H.; Wright, E. M., Mechanisms of the human intestinal H<sup>+</sup>-coupled oligopeptide transporter hPEPT1. *J. Biol. Chem.* **1996**, 271, (10), 5430-7.
19. Mackenzie, B.; Loo, D. D.; Panayotova-Heiermann, M.; Wright, E. M., Biophysical characteristics of the pig kidney Na<sup>+</sup>/glucose cotransporter SGLT2 reveal a common mechanism for SGLT1 and SGLT2. *J. Biol. Chem.* **1996**, 271, (51), 32678-83.
20. Gu, H.; Wall, S. C.; Rudnick, G., Stable expression of biogenic amine transporters reveals differences in inhibitor sensitivity, kinetics, and ion dependence. *J. Biol. Chem.* **1994**, 269, (10), 7124-30.
21. Sucic, S.; Dallinger, S.; Zdravil, B.; Weissensteiner, R.; Jorgensen, T. N.; Holy, M.; Kudlacek, O.; Seidel, S.; Cha, J. H.; Gether, U.; Newman, A. H.; Ecker, G. F.; Freissmuth, M.; Sitte, H. H., The N terminus of monoamine transporters is a lever required for the action of amphetamines. *J. Biol. Chem.* **2010**, 285, (14), 10924-38.
22. Kaji, D. M., Na<sup>+</sup>/K<sup>+</sup>/2Cl<sup>-</sup> cotransport in medullary thick ascending limb cells: kinetics and bumetanide binding. *Biochim. Biophys. Acta* **1993**, 1152, (2), 289-99.
23. Ovens, M. J.; Davies, A. J.; Wilson, M. C.; Murray, C. M.; Halestrap, A. P., AR-C155858 is a potent inhibitor of monocarboxylate transporters MCT1 and MCT2 that binds to an intracellular site involving transmembrane helices 7-10. *Biochem. J.* **2010**, 425, (3), 523-30.
24. Wright, J. K.; Overath, P., Purification of the lactose:H<sup>+</sup> carrier of *Escherichia coli* and characterization of galactoside binding and transport. *Eur. J. Biochem.* **1984**, 138, (3), 497-508.
25. Wright, J. K.; Riede, I.; Overath, P., Lactose carrier protein of *Escherichia coli*: interaction with galactosides and protons. *Biochemistry* **1981**, 20, (22), 6404-15.
26. Boorer, K. J.; Frommer, W. B.; Bush, D. R.; Kreman, M.; Loo, D. D.; Wright, E. M., Kinetics and specificity of a H<sup>+</sup>/amino acid transporter from *Arabidopsis thaliana*. *J. Biol. Chem.* **1996**, 271, (4), 2213-20.
